# Supplementary material
Source: PubMed Central journal article supplement (PMC4399045)
Supplement: IAI.03003-14_zii999091200so1.pdf [file IAI.03003-14_zii999091200so1.pdf]

- 1 **SUPPLEMENTAL TABLE 1.** Bacterial shedding in feces and colonization levels of AIEC and AIEC $\Delta$ *ibeA* in
- 2 the mice intestine throughout infection.

|                | CFU x g <sup>-1</sup> (feces)                                                                                    |                                   |                                   |
|----------------|------------------------------------------------------------------------------------------------------------------|-----------------------------------|-----------------------------------|
|                | NRG857c                                                                                                          | NRG857c $\Delta$ <i>ibeA</i>      | MG1655 (K12 <i>E. coli</i> )      |
| Day 1          | 1.72E+09 ± 3.31E+08                                                                                              | 7.61E+08 ± 2.50E+08 <sup>ns</sup> | 3.17E+08 ± 2.15E+08**             |
| Day 2          | 2.69E+09 ± 7.37E+08                                                                                              | 4.03E+08 ± 1.52E+08 <sup>ns</sup> | 3.64E+06 ± 2.76E+06***            |
| Day 3          | 8.97E+07 ± 3.20E+07                                                                                              | 2.46E+07 ± 1.17E+07 <sup>ns</sup> | 1.63E+04 ± 1.10E+04***            |
| Day 4          | 1.74E+07 ± 1.61E+07                                                                                              | 8.40E+06 ± 4.64E+06 <sup>ns</sup> | 1.74E+04 ± 1.69E+04*              |
| Day 6          | 6.73E+03 ± 4.52E+03                                                                                              | 4.24E+04 ± 2.62E+04 <sup>ns</sup> | 1.84E+01 ± 1.84E+01 <sup>ns</sup> |
| Day 8          | 1.56E+03 ± 1.01E+03                                                                                              | 4.96E+04 ± 3.97E+04 <sup>ns</sup> | ND <sup>ns</sup>                  |
| Day 10         | 9.74E+02 ± 9.08E+02                                                                                              | 1.60E+04 ± 1.41E+04 <sup>ns</sup> | ND <sup>ns</sup>                  |
| Day 12         | 6.08E+03 ± 6.07E+03                                                                                              | 5.77E+03 ± 3.99E+03 <sup>ns</sup> | ND <sup>ns</sup>                  |
| Day 14         | 1.31E+03 ± 9.38E+02                                                                                              | 2.63E+03 ± 1.65E+03 <sup>ns</sup> | ND <sup>ns</sup>                  |
|                |                                                                                                                  |                                   |                                   |
|                | CFU x g <sup>-1</sup> (organ)                                                                                    |                                   |                                   |
|                | NRG857c                                                                                                          | NRG857c $\Delta$ <i>ibeA</i>      | MG1655 (K12 <i>E. coli</i> )      |
| Day 4 (Ileum)  | 8.08E+03 ± 4.02E+03                                                                                              | 9.06E+02 ± 4.19E+02 <sup>ns</sup> | ND**                              |
| Day 4 (Cecum)  | 5.03E+05 ± 2.95E+05                                                                                              | 3.95E+06 ± 2.54E+06 <sup>ns</sup> | 2.79E+03 ± 2.65E+03*              |
| Day 4 (Colon)  | 3.27E+05 ± 2.81E+05                                                                                              | 3.42E+05 ± 3.12E+05 <sup>ns</sup> | 6.36E+03 ± 6.17E+03*              |
| Day 14 (Ileum) | 1.29E+02 ± 1.05E+02                                                                                              | 2.44E+04 ± 2.17E+04 <sup>ns</sup> | ND <sup>ns</sup>                  |
| Day 14 (Cecum) | 7.08E+02 ± 5.17E+02                                                                                              | 3.11E+03 ± 2.41E+03 <sup>ns</sup> | ND <sup>ns</sup>                  |
| Day 14 (Colon) | 4.19E+02 ± 3.10E+02                                                                                              | 4.14E+02 ± 3.56E+02 <sup>ns</sup> | ND <sup>ns</sup>                  |
|                |                                                                                                                  |                                   |                                   |
|                | Values represent the mean ± SE at each time point                                                                |                                   |                                   |
|                | * $P \leq 0.05$ , ** $P \leq 0.01$ , *** $P \leq 0.001$ denote statistical significance when compared to NRG857c |                                   |                                   |
|                | ND = non detectable levels of bacteria                                                                           |                                   |                                   |

3

4

5 Supplemental Figures

6

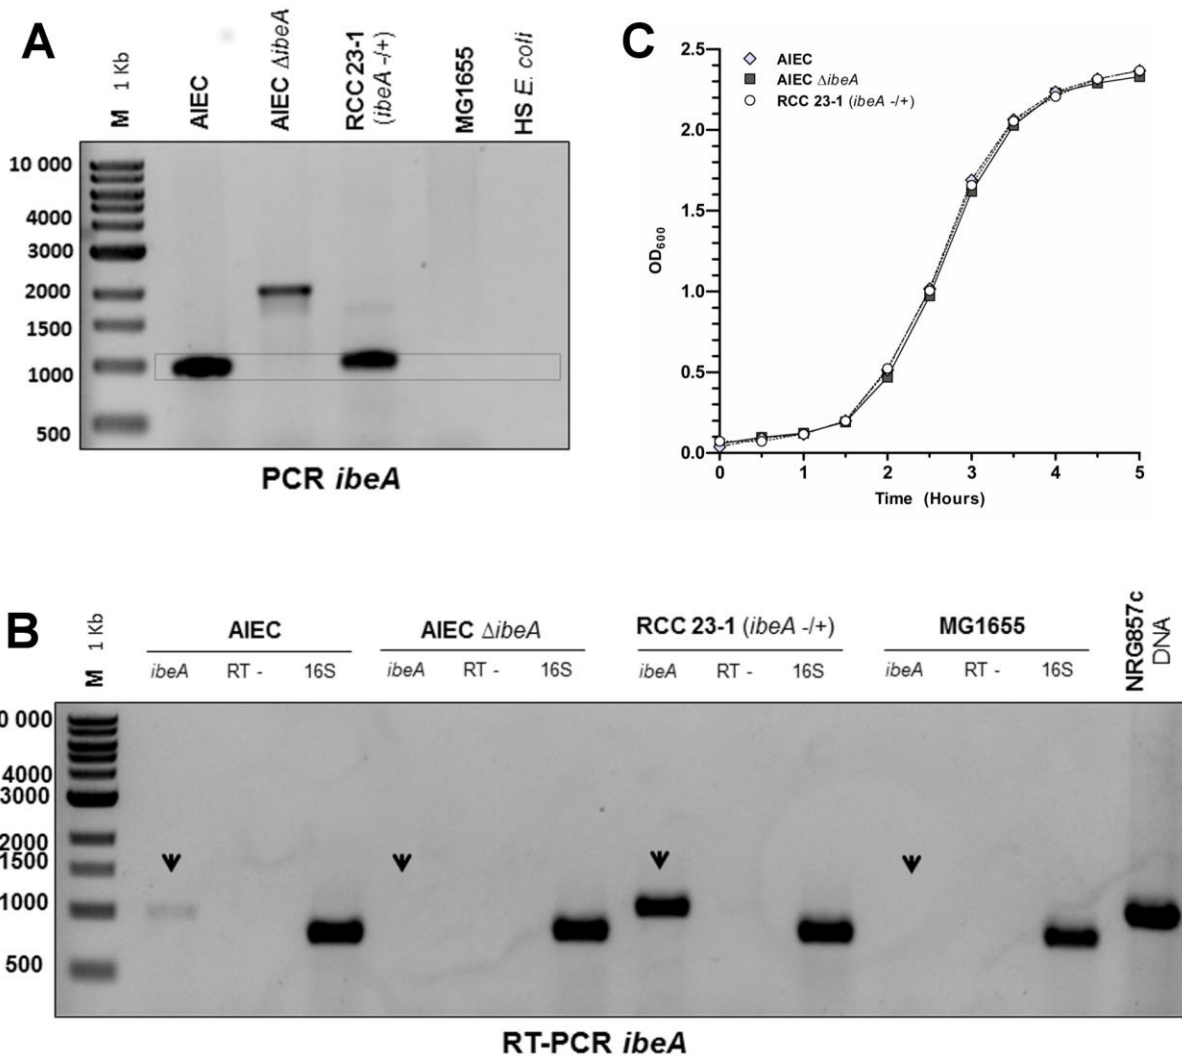

7

8

9 **SUPPLEMENTAL FIGURE 1. Deletion of *ibeA* at genomic and transcriptional levels.** Genomic DNA from

10 AIEC strain NRG857c, AIEC $\Delta$ *ibeA* (NRG857c $\Delta$ *ibeA*) and the complemented RCC23-1 strain (*ibeA*-/+),

11 were used to test for the presence of *ibeA*. As negative controls the strains MG1655 and *E. coli* HS were

12 used (A). RNA was also extracted and RT-PCR performed on the same strains. 16S ribosomal RNA was

13 used as an internal expression control. The absence of *ibeA* can be observed in AIEC $\Delta$ *ibeA*, while a

14 transcript is observed in the wild type strain (B). The growth of the strains was monitored in LB broth up to

15 5 h (C).

16

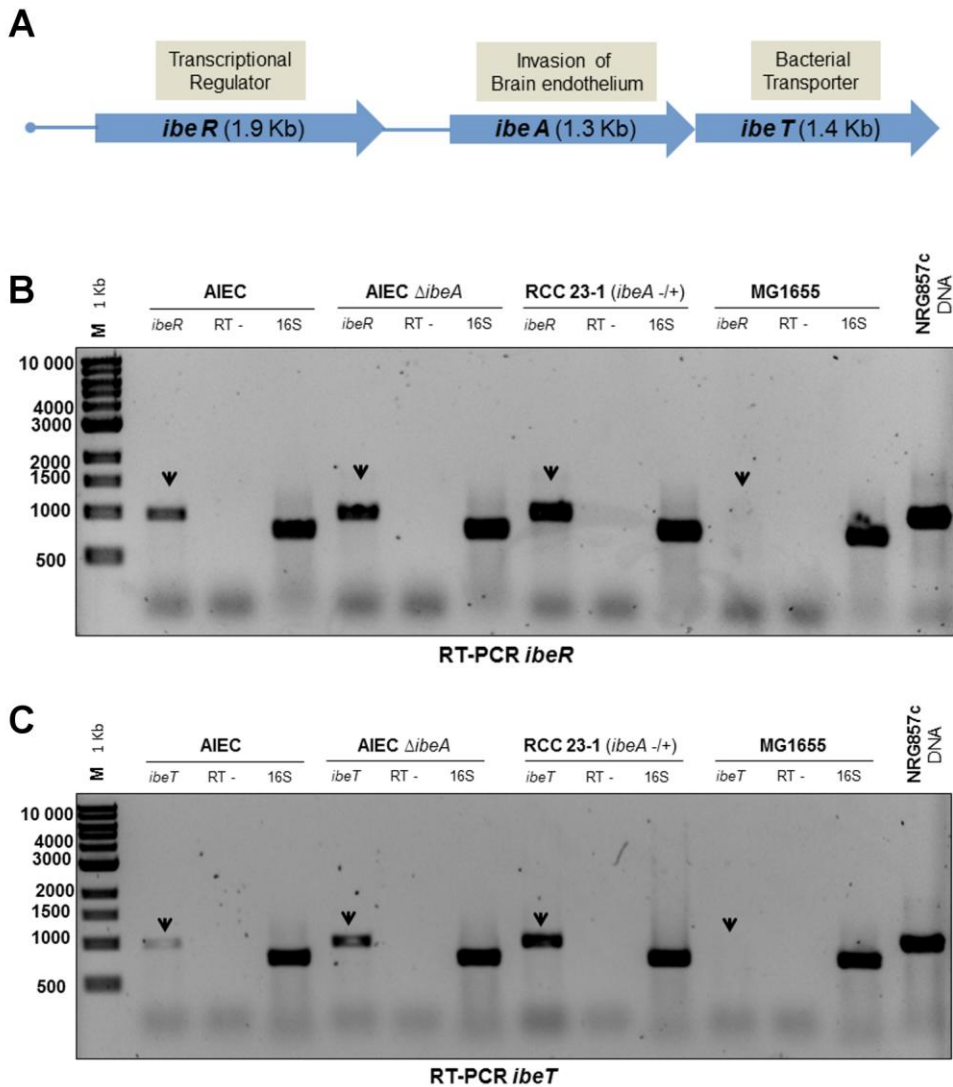

18

19 **SUPPLEMENTAL FIGURE 2. Effect of *ibeA* deletion in the other members of the *ibeRAT* operon.** An  
 20 schematic model of the *ibeRAT* operon is depicted, with the putative roles of each gene product (**A**).  
 21 RNA was extracted and the effect on the two other members of the operon was evaluated by RT-PCR for  
 22 *ibeR* (**B**) and *ibeT* (**C**). The non pathogenic *E. coli* K12 strain MG1655 was used as a negative control. 16S  
 23 ribosomal RNA was used as internal expression control.

24

25

26

27

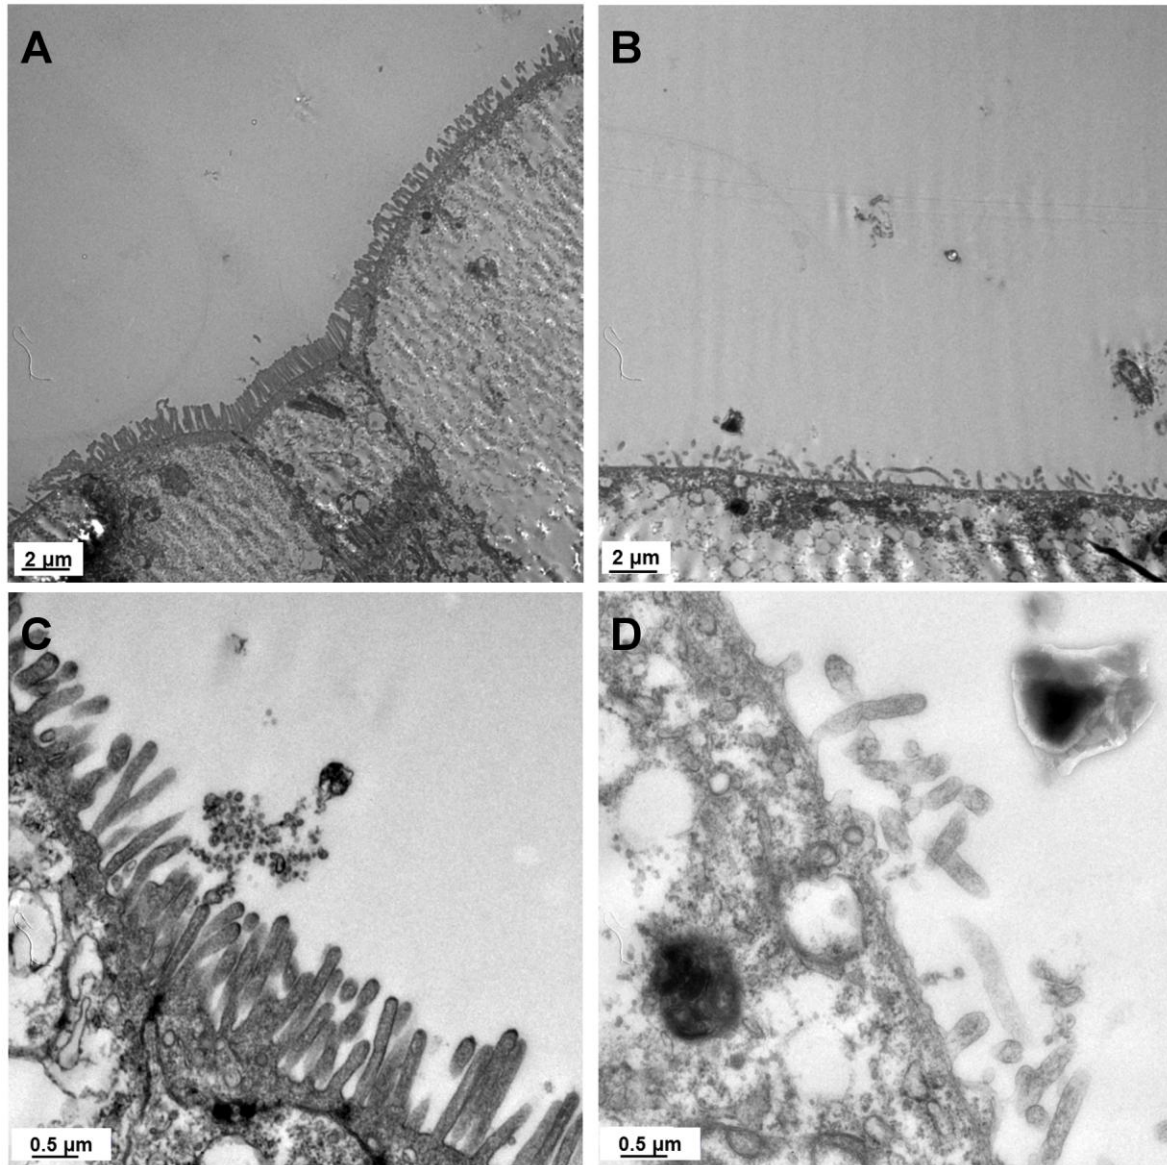

29

30 **SUPPLEMENTAL FIGURE 3. Generation of M-like cells.** Fourteen days after polarization, Caco-2 cells  
 31 were co-cultured with Raji B cells to generate M-like cells. Representative TEM of Caco-2 monolayers **(A)**  
 32 and M-like cells **(B)** are shown with magnified images of selected areas underneath **(C and D)**. Regions  
 33 devoid of microvilli are observed in M-like cells. These regions were not observed in Caco-2 mono-  
 34 cultures.

35
